# Supplementary material
Source: Royal Society of Chemistry journal article supplement (doi:10.1039/d6cc02940j)
Supplement: d6cc02940j1.pdf [file d6cc02940j1.pdf]

## Electronic Supporting Information

### **Core-shell CuFeMnHCF@CuHCF: a high-rate and durable Prussian blue cathode for sodium-ion batteries**

Shumin Sun,<sup>\*a</sup> Haibo Lei,<sup>a</sup> Yunpeng Ma,<sup>a</sup> Xia Cao<sup>\*a,b</sup> and Peiyuan Wang<sup>\*a,c</sup>

<sup>a</sup> *College of Material and Chemical Engineering, Zhengzhou University of Light Industry, Zhengzhou 450001, P. R. China. E-mail: smsun@zzuli.edu.cn*

<sup>b</sup> *Collaborative Innovation Center of Environmental Pollution Control and Ecological Restoration of Henan Province, Zhengzhou 450001, China. E-mail: 2020003@zzuli.edu.cn*

<sup>b</sup> *Henan Provincial Key Laboratory of Surface and Interface Science, Zhengzhou University of Light Industry, Zhengzhou 450001, P. R. China. E-mail: peiyuanwang@zzuli.edu.cn*

## Synthesis of Prussian blue analogue

CuFeMnHCF@CuHCF was synthesized via a co-precipitation method. The typical synthesis procedure is as follows: 5 mmol of  $\text{Na}_4\text{Fe}(\text{CN})_6 \cdot 10\text{H}_2\text{O}$  was dissolved in 100 mL of deionized (DI) water to form Solution A. Separately, 4 mmol of  $\text{MnSO}_4 \cdot \text{H}_2\text{O}$ , 1 mmol of  $\text{FeSO}_4 \cdot 7\text{H}_2\text{O}$ , and 5 mmol of sodium citrate were dissolved in 100 mL of DI water to form Solution B. In addition, 1 mmol of  $\text{CuSO}_4 \cdot 5\text{H}_2\text{O}$  was dissolved in 20 mL of DI water to prepare Solution C. Subsequently, Solution B was dropwise added into Solution A at a flow rate of 10 mL/h using a peristaltic pump. After the completion of the dropwise addition of Solution B, Solution C was further titrated into Solution A. During the dropping process, the mixture was continuously stirred under an argon atmosphere for 12 h. After the reaction, the mixture was aged statically for 12 h, and the precipitate was collected by centrifugation. The obtained solid was washed several times with deionized water and ethanol, and then dried in a vacuum oven at 120 °C for 12 h. The final product was denoted as CuFeMnHCF@CuHCF.

For comparison, FeMnHCF was prepared using a similar procedure. For FeMnHCF, the  $\text{CuSO}_4$  solution was not involved in the synthesis, and the remaining steps were identical to those described above.

## Material characterization

The as-synthesized samples were characterized to elucidate their physicochemical properties. Their morphologies and microstructures were examined using scanning electron microscopy (SEM, ZEISS Sigma 360) and transmission electron microscopy (TEM, FEI Tecnai G2 F20). The crystalline phase was identified by X-ray diffraction (XRD) on a Bruker D8 Advance instrument with  $\text{Cu K}\alpha$  radiation ( $\lambda = 1.54056 \text{ \AA}$ ), scanning a  $2\theta$  range from  $5^\circ$  to  $80^\circ$ . The XRD data were analyzed by Rietveld refinement with GSAS software.<sup>1</sup> X-ray photoelectron spectroscopy (XPS, Thermo Fisher Scientific) was employed to analyze the surface chemical composition and the valence states of Mn, Fe, and Cu. Raman spectra were acquired with a confocal laser micro-Raman spectrometer (HORIBA, Lab RAM HR Evolution). The contents of Na, Fe, Mn, and Cu were determined by inductively coupled plasma optical emission

spectroscopy (ICP-OES, Agilent 5800). Carbon, hydrogen, and nitrogen contents were measured using a VARIO EL III elemental analyzer. Thermogravimetric analysis (TGA, NETZSCH STA 449 F3) was performed from room temperature to 400 °C under N<sub>2</sub> atmosphere at a heating rate of 10 °C min<sup>-1</sup> to determine the water content.

## Reference

1. Larson, A. C. & Dreele, R. B. V. General structure analysis system (GSAS) (Report LAUR 86-748, Los Alamos National Laboratory, 2004).

## Electrochemical measurements

The electrochemical properties of the obtained FeMnHCF and CuMnHCF@CuHCF materials were tested by assembling CR2032 coin cells in an argon-protected glovebox (MIKROUNA, Model Super 1220/750/900, H<sub>2</sub>O < 0.1 ppm, O<sub>2</sub> < 0.1 ppm). The cell assembly parameters are as follows: FeMnHCF or CuFeMnHCF@CuHCF were used as the working electrodes, metallic sodium as the counter electrode, the electrolyte was a 1.0 mol/L sodium perchlorate (NaClO<sub>4</sub>) solution in a mixture of ethylene carbonate (EC), dimethyl carbonate (DMC), and ethyl methyl carbonate (EMC) (volume ratio 1:1:1) with the addition of 2 vol.% fluoroethylene carbonate (FEC), and Whatman glass fiber was employed as the separator. The preparation process of the working electrodes is as follows: First, the active material, Ketjen black (conductive agent), and polyvinylidene fluoride (PVDF, binder) were mixed at a mass ratio of 7:2:1, and dispersed in N-methyl-2-pyrrolidone (NMP) to form a homogeneous slurry. Subsequently, the slurry was uniformly coated on aluminum foil and dried in a vacuum oven at 120°C for 12 h. Finally, the aluminum foil coated with active material was punched into 14 mm-diameter disks to obtain the working electrodes, with the active material loading mass of approximately 1 mg. For electrochemical measurements, galvanostatic charge-discharge testing, cyclic voltammetry (CV), and electrochemical impedance spectroscopy (EIS) were performed using a Land battery testing system (China, Model CT4008TNn-5V10mA-164) and an electrochemical workstation (China, Model CHI660e), respectively. The cells were galvanostatically charged and discharged between 2.0 and 4.0 V at various current

densities. The capacity was calculated based on the mass of the active material in the electrode, excluding the mass of the conductive carbon (Ketjen black).

Galvanostatic intermittent titration (GITT) measurement was used to evaluate the Na<sup>+</sup> diffusion coefficient ( $D$ ) of the FeMnHCF and CuFeMnHCF@CuHCF.  $D$  can be calculated by using Fick's second law as follows:

$$D = \frac{4}{\pi\tau} \left( \frac{V_M m_B}{S M_B} \right)^2 \left( \frac{\Delta E_s}{\Delta E_\tau} \right)^2$$

where  $V_M$ ,  $m_B$ ,  $M_B$ , and  $S$  are molar volume, mass, molar mass, and electrode area, respectively.  $\tau$  is the pulse time (s).  $\Delta E_s$  and  $\Delta E_\tau$  are the differences of voltage and time, respectively.

In-situ XRD measurements were performed using a custom-designed electrochemical cell compatible with a Bruker D8 Advance diffractometer (Cu K $\alpha$  radiation,  $\lambda = 1.5406 \text{ \AA}$ ). The cell was equipped with a beryllium (Be) window to allow X-ray transmission during electrochemical cycling. The working electrode was prepared by coating a slurry of active material (80 wt%), Super P (10 wt%), and PVDF (10 wt%) in NMP onto an Al foil, The counter electrode was a sodium metal disc, and the separator was a glass fiber membrane (Whatman GF/D). The electrolyte was 1 M NaPF<sub>6</sub> in a 1:1 volume ratio of EC/DEC. The cell was assembled in an argon-filled glovebox (O<sub>2</sub> < 0.1 ppm, H<sub>2</sub>O < 0.1 ppm).

Table S1. Crystallographic parameters of FeMnHCF obtained from XRD Rietveld refinement.

FeMnHCF, Monoclinic, space group P21/n, a = 10.590084 Å, b = 7.575208 Å, c = 7.390153 Å,  $\alpha = 90^\circ$ ,  $\beta = 92.0188^\circ$ ,  $\gamma = 90^\circ$ , V = 592.8535 Å<sup>3</sup>, weighted profile R-factor, Rwp=9.2 %.

| Atom | X       | Y       | Z       | Site | Occ    |
|------|---------|---------|---------|------|--------|
| Na1  | 0.25775 | 0.44553 | 0.02722 | 4e   | 1.0000 |
| Fe2  | 0.50000 | 0.00000 | 1.00000 | 2d   | 1.0000 |
| Mn3  | 0.50000 | 0.50000 | 0.50000 | 2a   | 0.8000 |
| Fe4  | 0.50000 | 0.50000 | 0.50000 | 2a   | 0.2000 |
| N5   | 0.49939 | 0.31393 | 0.74298 | 4e   | 1.0000 |
| N6   | 0.29412 | 0.50590 | 0.50582 | 4e   | 1.0000 |
| N7   | 0.50173 | 0.26558 | 0.31835 | 4e   | 1.0000 |
| C8   | 0.49796 | 0.19145 | 0.83494 | 4e   | 1.0000 |
| C9   | 0.18931 | 0.49940 | 0.51831 | 4e   | 1.0000 |
| C10  | 0.50246 | 0.16216 | 0.20308 | 4e   | 1.0000 |

Table S2. Crystallographic parameters of FeMnHCF@CuHCF obtained from XRD Rietveld refinement.

| CuFeMnHCF (93.2 wt%) in CuFeMnHCF@CuHCF, Monoclinic, space group P21/n, a = 10.531471 Å, b = 7.540678 Å, c = 7.351224 Å, $\alpha = 90^\circ$ , $\beta = 91.9554^\circ$ , $\gamma = 90^\circ$ , V = 583.7932 Å <sup>3</sup> , weighted profile R-factor, Rwp= 8.7 %. |         |         |         |      |        |
|---------------------------------------------------------------------------------------------------------------------------------------------------------------------------------------------------------------------------------------------------------------------|---------|---------|---------|------|--------|
| Atom                                                                                                                                                                                                                                                                | X       | Y       | Z       | Site | Occ    |
| Na1                                                                                                                                                                                                                                                                 | 0.25775 | 0.44553 | 0.02722 | 4e   | 1.0000 |
| Fe2                                                                                                                                                                                                                                                                 | 0.50000 | 0.00000 | 1.00000 | 2d   | 1.0000 |
| Mn3                                                                                                                                                                                                                                                                 | 0.50000 | 0.50000 | 0.50000 | 2a   | 0.7900 |
| Fe4                                                                                                                                                                                                                                                                 | 0.50000 | 0.50000 | 0.50000 | 2a   | 0.1900 |
| Cu5                                                                                                                                                                                                                                                                 | 0.50000 | 0.50000 | 0.50000 | 2a   | 0.0200 |
| N6                                                                                                                                                                                                                                                                  | 0.49939 | 0.31393 | 0.74298 | 4e   | 1.0000 |
| N7                                                                                                                                                                                                                                                                  | 0.29412 | 0.50590 | 0.50582 | 4e   | 1.0000 |
| N8                                                                                                                                                                                                                                                                  | 0.50173 | 0.26558 | 0.31835 | 4e   | 1.0000 |
| C9                                                                                                                                                                                                                                                                  | 0.49796 | 0.19145 | 0.83494 | 4e   | 1.0000 |
| C10                                                                                                                                                                                                                                                                 | 0.18931 | 0.49940 | 0.51831 | 4e   | 1.0000 |
| C11                                                                                                                                                                                                                                                                 | 0.50246 | 0.16216 | 0.20308 | 4e   | 1.0000 |
| CuHCF (6.8 wt%) in FeMnHCF@CuHCF, Cubic, space group Fm-3m, a = b = c = 9.986000 Å, $\alpha = \beta = \gamma = 90^\circ$ , V = 995.5965 Å <sup>3</sup> , weighted profile R-factor, Rwp=8.7 %.                                                                      |         |         |         |      |        |
| Atom                                                                                                                                                                                                                                                                | X       | Y       | Z       | Site | Occ    |
| Fe1                                                                                                                                                                                                                                                                 | 0.00000 | 0.00000 | 0.00000 | 4a   | 1.0000 |
| Cu2                                                                                                                                                                                                                                                                 | 0.50000 | 0.00000 | 0.00000 | 4b   | 1.0000 |
| Cu3                                                                                                                                                                                                                                                                 | 0.25000 | 0.25000 | 0.25000 | 8c   | 0.5000 |
| C4                                                                                                                                                                                                                                                                  | 0.19600 | 0.00000 | 0.00000 | 24e  | 1.0000 |
| N5                                                                                                                                                                                                                                                                  | 0.31200 | 0.00000 | 0.00000 | 24e  | 1.0000 |

Table S3. Summary of fitted EIS parameters for FeMnHCF and CuFeMnHCF@CuHCF.

| Samples         | $R_s(\Omega)$ | $R_{ct}(\Omega)$ | $R_{mt}(\Omega)$ | $CPE_1$ | $CPE_2$ | $z$       |
|-----------------|---------------|------------------|------------------|---------|---------|-----------|
| FeMnHCF         | 14.0          | 782.8            | 787.1            | 0.8383  | 0.9343  | 0.0001501 |
| CuFeMnCHF@CuHCF | 8.3           | 521.5            | 520.8            | 0.8930  | 0.9571  | 0.0002662 |

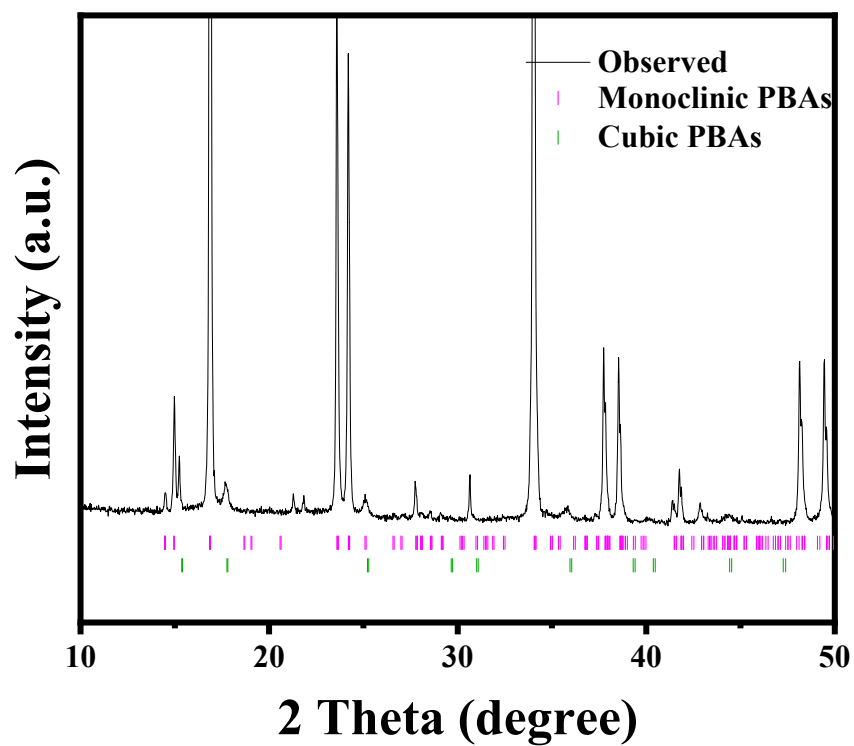

Fig. S1 Enlarged XRD pattern of CuFeMnHCF@CuHCF in the selected  $2\theta$  range

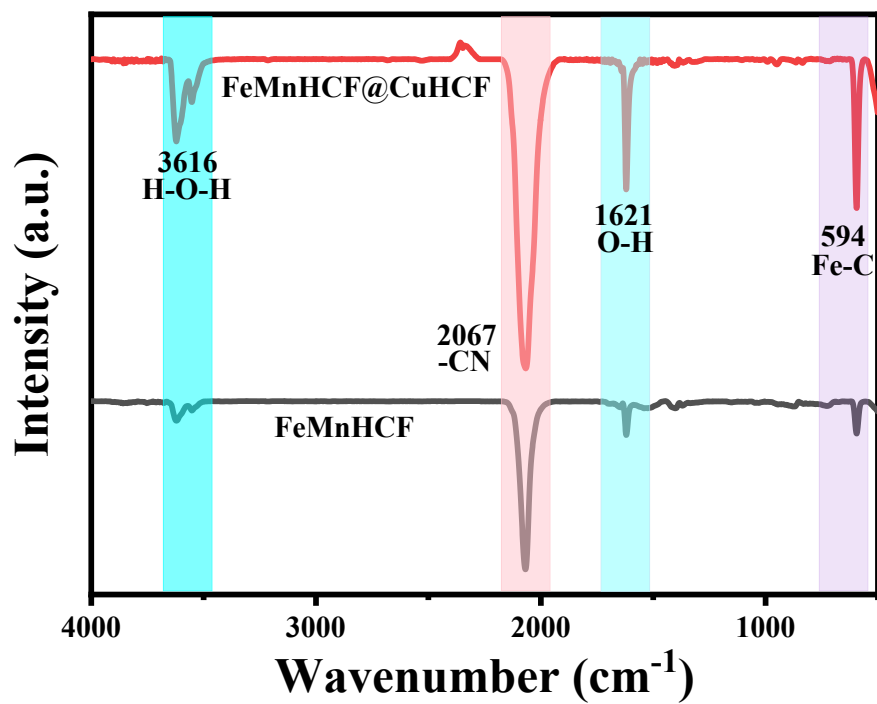

Fig. S2 FTIR spectra of FeMnHCF and CuFeMnHCF@CuHCF

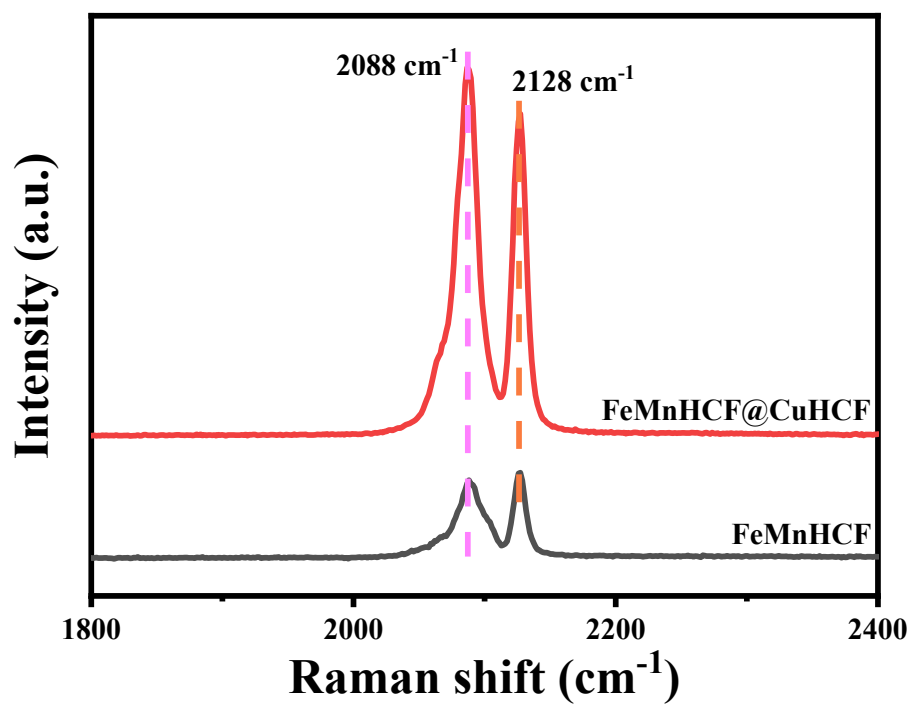

Fig. S3 Raman spectra of FeMnHCF and CuFeMnHCF@CuHCF

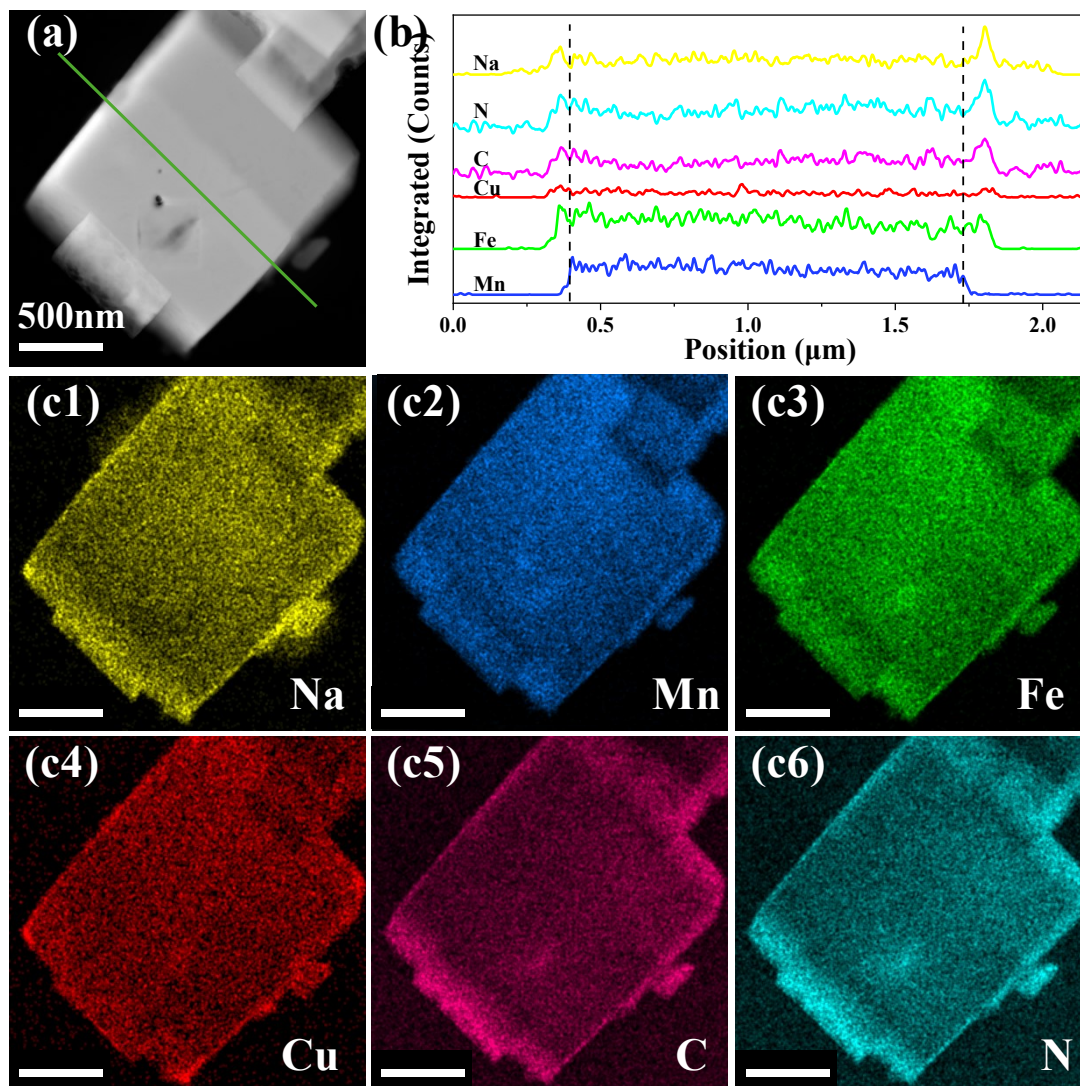

Fig. S4 TEM image (a), EDS maps (c) and the line-scan profile (b) of CuFeMnHCF@CuHCF

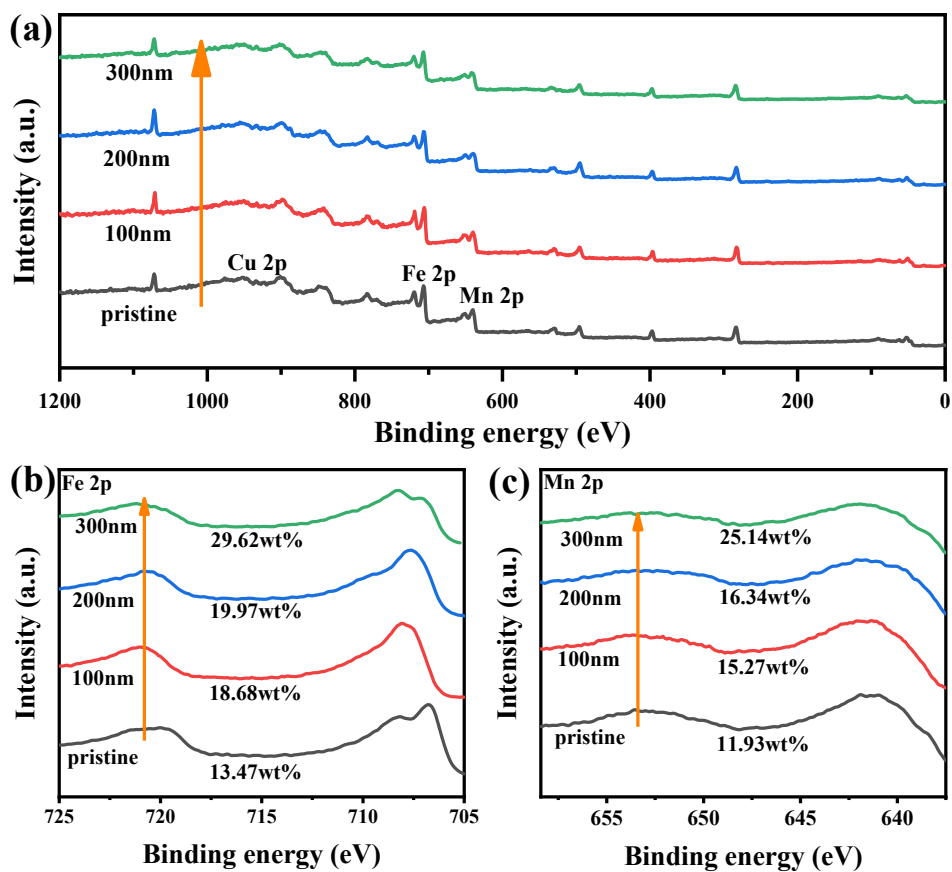

Fig. S5 Depth-profiling XPS spectra of CuFeMnHCF@CuHCF as a function of argon sputtering time: (a) Full survey, (b) Fe 2p, and (c) Mn 2p.

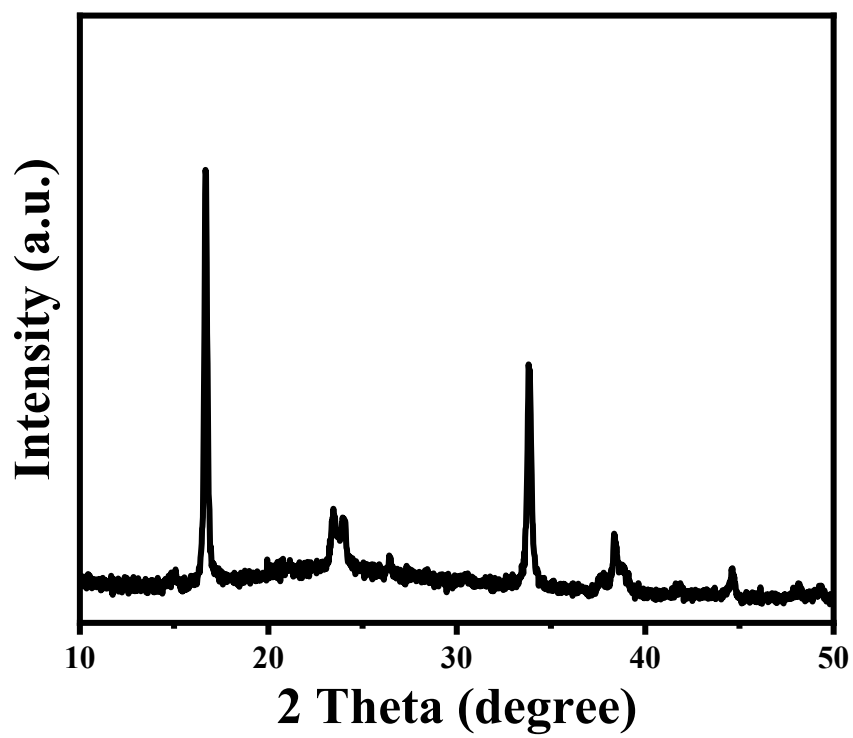

Fig. S6 XRD pattern of CuFeMnHCF@CuHCF after 150 cycles

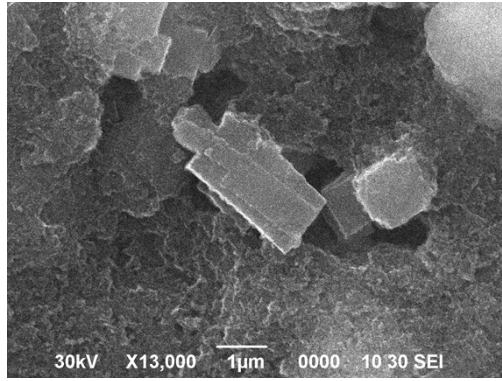

Fig. S7 SEM image of CuFeMnHCF@CuHCF after 150 cycles
